# Supplementary material for: Leishmania infection induces a limited differential gene expression in the sand fly midgut
Source: PubMed Central journal article supplement (PMC7487717; doi:10.1186/s12864-020-07025-8), 2020-09-04

**Color Key and Histogram**

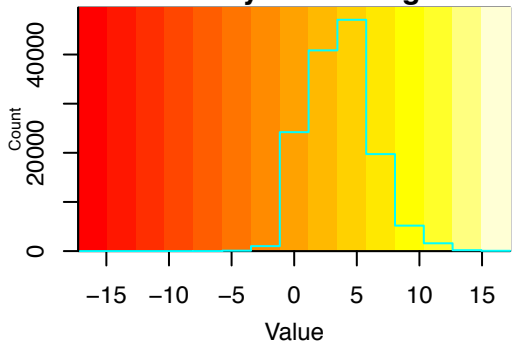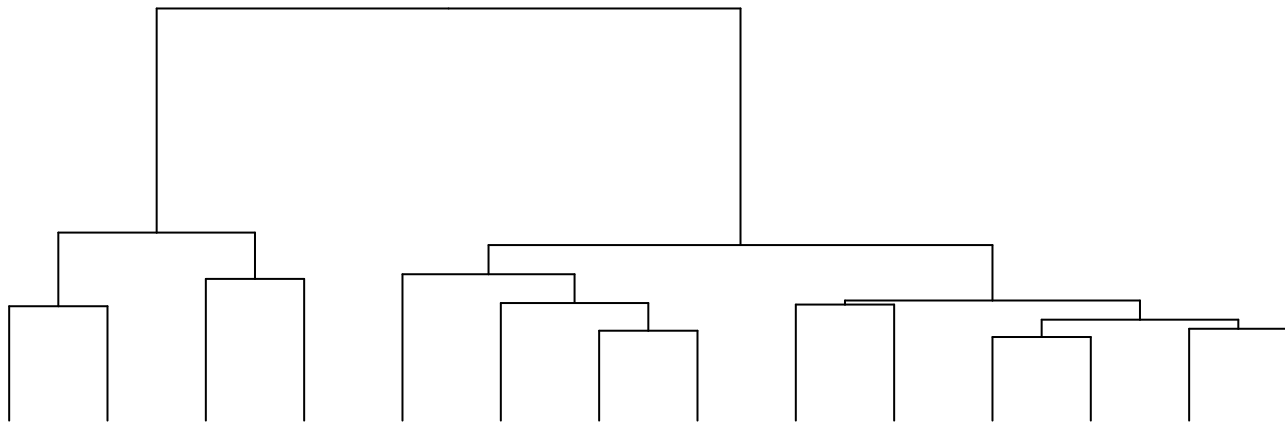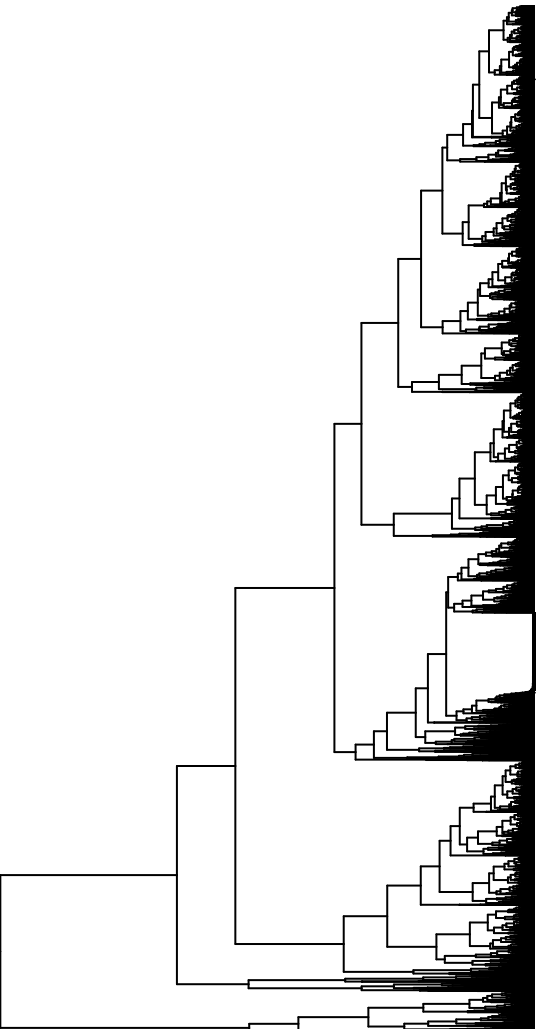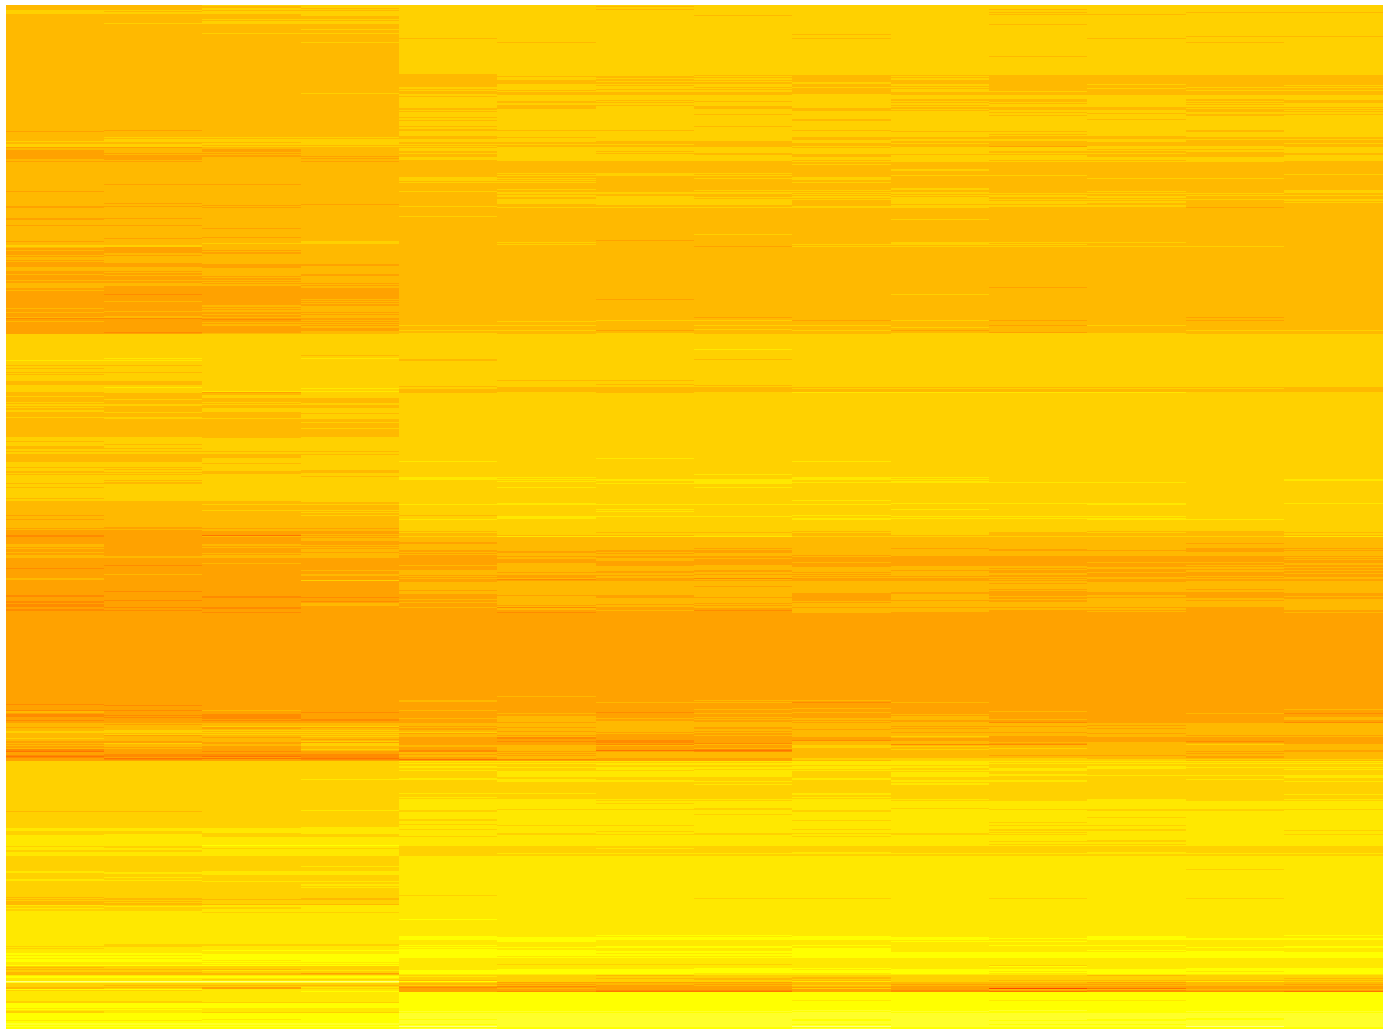

1dPBM  
1dPi  
2dPi  
2dPBM  
4dPi  
14dPBM  
12dPi  
14dPi  
4dPBM  
12dPBM  
8dPBM  
6dPBM  
6dPi  
8dPi

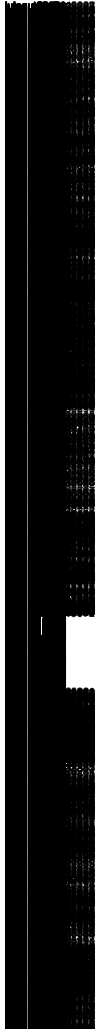

Supplement: 12864_2020_7025_MOESM2_ESM.pdf [file 12864_2020_7025_MOESM2_ESM.pdf]
