# Supplementary material for: Leishmania infection induces a limited differential gene expression in the sand fly midgut
Source: PubMed Central journal article supplement (PMC7487717; doi:10.1186/s12864-020-07025-8), 2020-09-04

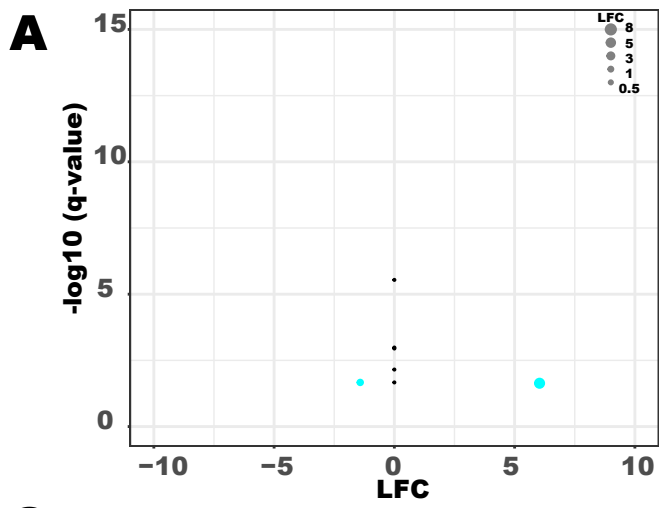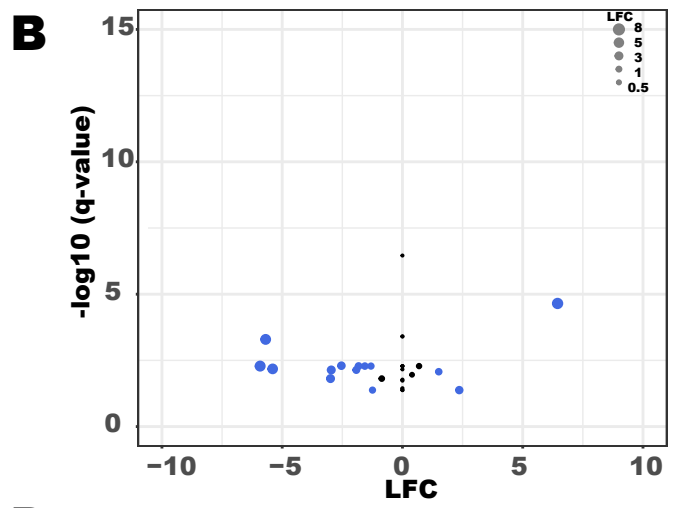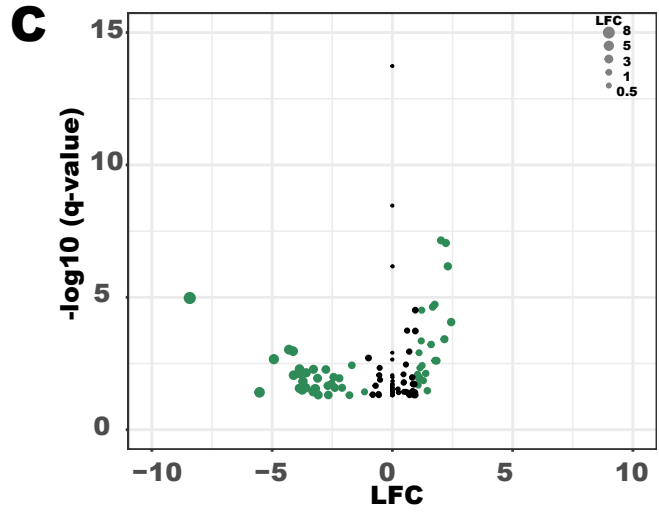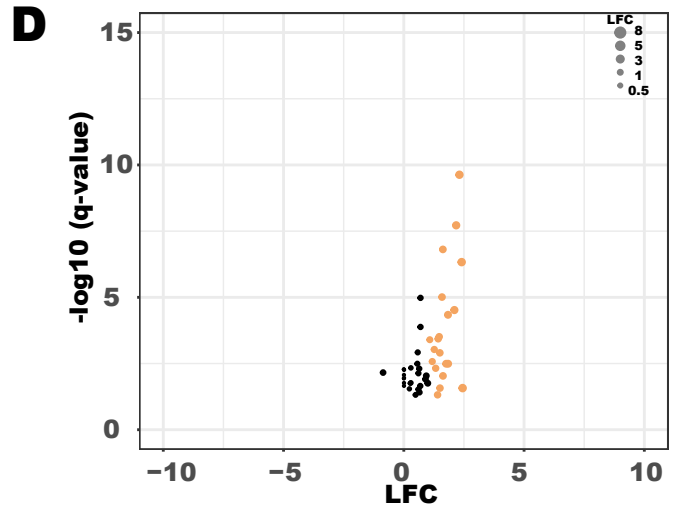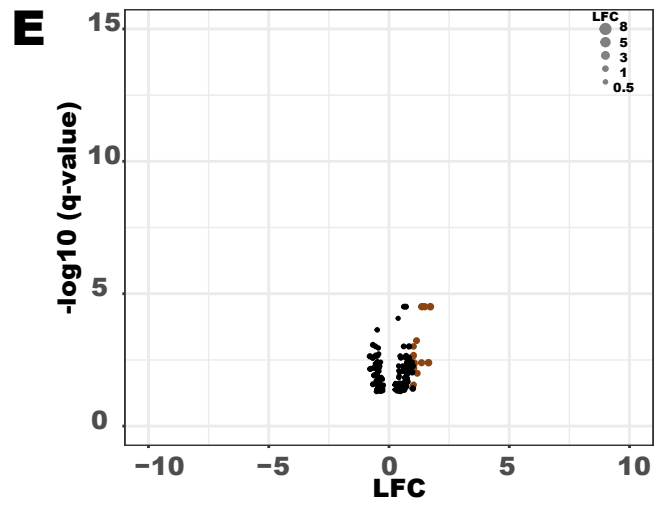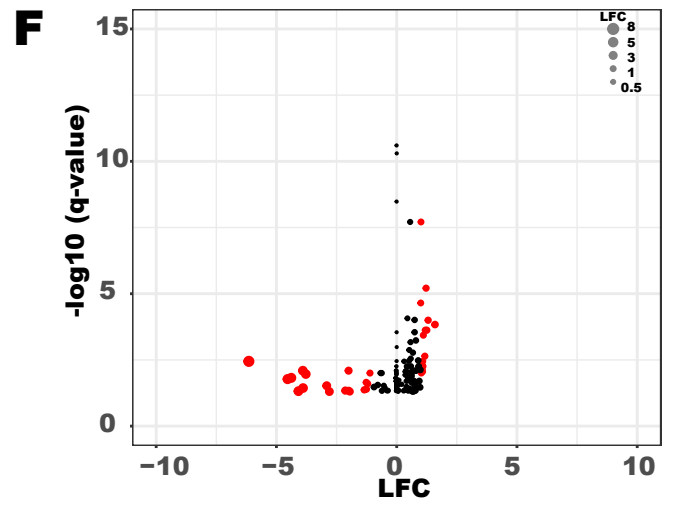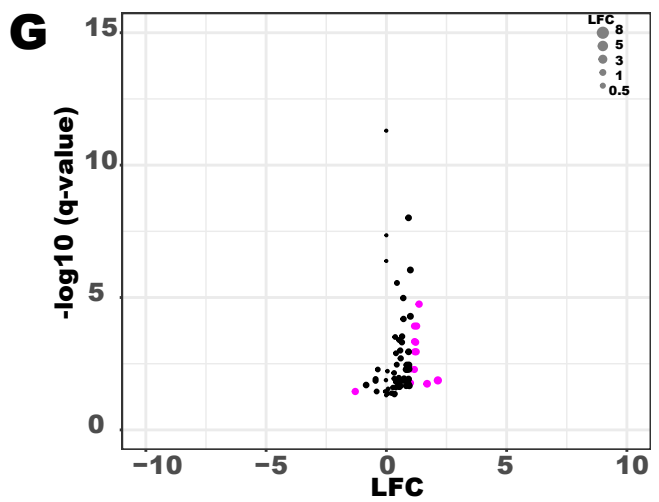

Supplement: 12864_2020_7025_MOESM10_ESM.pdf [file 12864_2020_7025_MOESM10_ESM.pdf]
